# Supplementary material
Source: publisher figshare collection journal article supplement (https://frontiersin.figshare.com/ndownloader/files/22724606)
Supplement: Supplementary file [file 22724606]

## **Supplementary Information**

Concurrent and Delayed Behavioural and Monoamine Alterations  
by Excessive Sucrose Intake in Juvenile Mice

Won-Hui Choe, Kyung-A Lee, Yukiori Goto, and Young-A Lee

**Supplementary Table S1**

**Supplementary Table S2**

**Supplementary Table S3**

**Supplementary Figure S1**

**Supplementary Table S1. Summary of behavioral alterations induced by excessive SUC and SAC intakes in the juvenile period.**

|                    | Juvenile    |                  | Adulthood |        |
|--------------------|-------------|------------------|-----------|--------|
|                    | SUC         | SAC              | SUC       | SAC    |
| AMP Response       | ---         | Lower at 3 mg/kg | Stronger  | Weaker |
| Sucrose Preference | Lower at 5% | Lower at 5%      | ---       | ---    |
| Stress Response    | Higher      | ---              | ---       | ---    |
| Anxiety            | ---         | Lower            | Higher    | ---    |
| Attention          | ---         | ---              | ---       | ---    |
| Social Behavior    | ---         | ---              | ---       | ---    |

**Supplementary Table S2. Summary of monoamine alterations in juvenile animals induced by excessive SUC and SAC intakes in the juvenile period.**

|             | DA  |     | DOPAC/DA |      | HVA/DA |      | DAT |     |             | 5-HT |     | 5-HIAA/5-HT |      | SERT |     |
|-------------|-----|-----|----------|------|--------|------|-----|-----|-------------|------|-----|-------------|------|------|-----|
|             | SUC | SAC | SUC      | SAC  | SUC    | SAC  | SUC | SAC |             | SUC  | SAC | SUC         | SAC  | SUC  | SAC |
| <b>PFC</b>  | --- | --- | ---      | ---  | ---    | ---  | --- | --- | <b>PFC</b>  | ---  | --- | ---         | ---  | ---  | --- |
| <b>dSTR</b> | Low | Low | ---      | High | ---    | High | --- | --- | <b>dSTR</b> | Low  | Low | ---         | High | High | --- |
| <b>NAcc</b> | --- | Low | ---      | High | ---    | High | --- | --- | <b>NAcc</b> | ---  | Low | ---         | High | ---  | --- |
| <b>HPC</b>  | --- | --- | ---      | ---  | ---    | ---  | --- | --- | <b>HPC</b>  | ---  | --- | ---         | ---  | ---  | --- |
| <b>AMY</b>  | --- | --- | ---      | ---  | ---    | ---  | --- | --- | <b>AMY</b>  | ---  | --- | ---         | ---  | ---  | --- |
| <b>VTA</b>  | --- | --- | ---      | ---  | ---    | ---  | --- | --- | <b>VTA</b>  | ---  | --- | ---         | ---  | ---  | --- |

**Supplementary Table S3. Summary of monoamine alterations in adult animals induced by excessive SUC and SAC intakes in the juvenile period.**

|             | DA   |      | DOPAC/DA |     | HVA/DA |     | DAT  |      |             | 5-HT |     | 5-HIAA/5-HT |     | SERT |      |
|-------------|------|------|----------|-----|--------|-----|------|------|-------------|------|-----|-------------|-----|------|------|
|             | SUC  | SAC  | SUC      | SAC | SUC    | SAC | SUC  | SAC  |             | SUC  | SAC | SUC         | SAC | SUC  | SAC  |
| <b>PFC</b>  | ---  | ---  | ---      | --- | ---    | --- | High | High | <b>PFC</b>  | ---  | --- | ---         | --- | High | High |
| <b>dSTR</b> | ---  | ---  | ---      | --- | ---    | --- | High | High | <b>dSTR</b> | ---  | --- | ---         | --- | High | High |
| <b>NAcc</b> | High | ---  | ---      | --- | ---    | --- | High | ---  | <b>NAcc</b> | ---  | --- | ---         | --- | High | High |
| <b>HPC</b>  | ---  | High | ---      | --- | ---    | --- | ---  | ---  | <b>HPC</b>  | ---  | --- | ---         | --- | ---  | High |
| <b>AMY</b>  | Low  | Low  | ---      | --- | ---    | --- | High | ---  | <b>AMY</b>  | ---  | --- | Low         | Low | High | High |
| <b>VTA</b>  | High | High | Low      | Low | ---    | --- | ---  | ---  | <b>VTA</b>  | ---  | --- | Low         | Low | ---  | ---  |

**Supplementary Figure S1. Control images for the fluorescence expression of brain tissue by Alexa Fluor® 488 and Alexa Fluor® 594 antibodies**

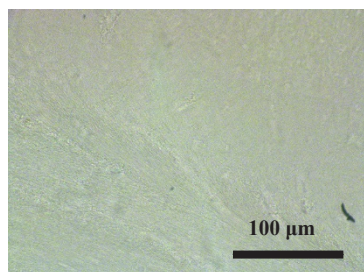

BF filter

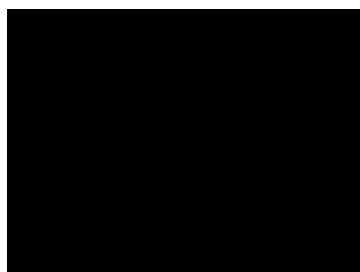

488nmfilter

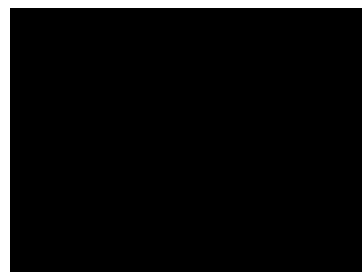

594 nmfilter
